# Supplementary material for: Erythropoietin in traumatic brain injury: study protocol for a randomised controlled trial
Source: PubMed Central journal article supplement (PMC4326467; doi:10.1186/s13063-014-0528-6), 2015-02-08
Supplement: 13063_2014_528_MOESM1_ESM.pdf [file 13063_2014_528_MOESM1_ESM.pdf]

**Project Title: Erythropoietin in Traumatic Brain Injury**  
**List of Participating Centres and responsible Ethics Committees**

| <b>Country / Site</b>                | <b>Ethics Committee</b>                                                                  | <b>Reference Number</b> |
|--------------------------------------|------------------------------------------------------------------------------------------|-------------------------|
| <b>Australia</b>                     |                                                                                          |                         |
| The Canberra Hospital                | ACT Health Human Research Ethics Committee                                               | ETH 11.09.1004          |
| John Hunter Hospital                 | Sydney West Area Service HREC (Nepean Campus)                                            | 09-49                   |
| Liverpool Hospital                   | Sydney West Area Service HREC (Nepean Campus)                                            | 09-49                   |
| Nepean Hospital ( <i>Lead Site</i> ) | Sydney West Area Service HREC (Nepean Campus)                                            | 09-49                   |
| Royal North Shore Hospital           | Sydney West Area Service HREC (Nepean Campus)                                            | 09-49                   |
| Royal Prince Alfred Hospital         | Sydney West Area Service HREC (Nepean Campus)                                            | 09-49                   |
| St Vincent's Sydney                  | Sydney West Area Service HREC (Nepean Campus)                                            | 09-49                   |
| Westmead Hospital                    | Sydney West Area Service HREC (Nepean Campus)                                            | 09-49                   |
| Gold Coast Hospital                  | Gold Coast Health Services District Ethics Committee                                     | HREC09QG-82             |
| The Townsville Hospital              | Townsville Health Service District Ethics Committee                                      | HREC09QTHS120           |
| Royal Adelaide Hospital              | Royal Adelaide Hospital HREC                                                             | 100812                  |
| Royal Hobart Hospital                | Human Research Ethics Committee (Tasmania)                                               | H0011010                |
| Alfred Hospital                      | Alfred Hospital Ethics Committee                                                         | 156/09                  |
| The Royal Melbourne Hospital         | Melbourne Health HREC                                                                    | 2009-183                |
| Royal Perth Hospital                 | Royal Perth Hospital Ethics Committee                                                    | EC 2010/016             |
| <b>New Zealand</b>                   |                                                                                          |                         |
| Auckland City Hospital               | Multi-region Ethics Committee                                                            | MEC/10/01/006           |
| Christchurch Hospital                | Multi-region Ethics Committee                                                            | MEC/10/01/006           |
| Wellington Regional Hospital         | Multi-region Ethics Committee                                                            | MEC/10/01/006           |
| Dunedin Hospital                     | Multi-region Ethics Committee                                                            | MEC/10/01/006           |
| <b>Kingdom of Saudi Arabia</b>       |                                                                                          |                         |
| King Abdulaziz Medical City          | Institutional; Review Board. National Guard Health Affairs - King Abdulaziz Medical City | RC10/063                |
| <b>Finland</b>                       |                                                                                          |                         |
| Helsinki University Central Hospital | Helsingin Ja Uudenmaan Sairaanhoidtopuri Helsingfors OCH Nylands Sjukvardsdistrikt       | 295.13.03.02.2011       |
| Kuopio University Hospital           | Helsingin Ja Uudenmaan Sairaanhoidtopuri Helsingfors OCH Nylands Sjukvardsdistrikt       | 295.13.03.02.2011       |

| <b>Country / Site</b>          | <b>Ethics Committee</b>                                  | <b>Reference Number</b> |
|--------------------------------|----------------------------------------------------------|-------------------------|
| <b>France</b>                  |                                                          |                         |
| Hôpital de Bicêtre             | Comite De Protection Des Personne – Ile de France 1      | 2012-mars-12863         |
| Hôpital Lariboisière           | Comite De Protection Des Personne – Ile de France 1      | 2012-mars-12863         |
| Hôpital Michallon              | Comite De Protection Des Personne – Ile de France 1      | 2012-mars-12863         |
| Hôpital Caremeau               | Comite De Protection Des Personne – Ile de France 1      | 2012-mars-12863         |
| Hôpital Charles-Nicolle        | Comite De Protection Des Personne – Ile de France 1      | 2012-mars-12863         |
| <b>Germany</b>                 |                                                          |                         |
| Johannes Gutenberg-Universität | Ethik Kommission der Landesärztekammer Rheinland – Pfalz | 837.383.12 (8484-A)     |
| <b>Ireland</b>                 |                                                          |                         |
| Beaumont Hospital              | Beaumont Hospital Ethics (Medical Research) Committee    | 13.04                   |
